# Supplementary material
Source: ML conference proceedings conference paper supplement (https://openreview.net/forum?id=Sf17j2pkCU)

# Results

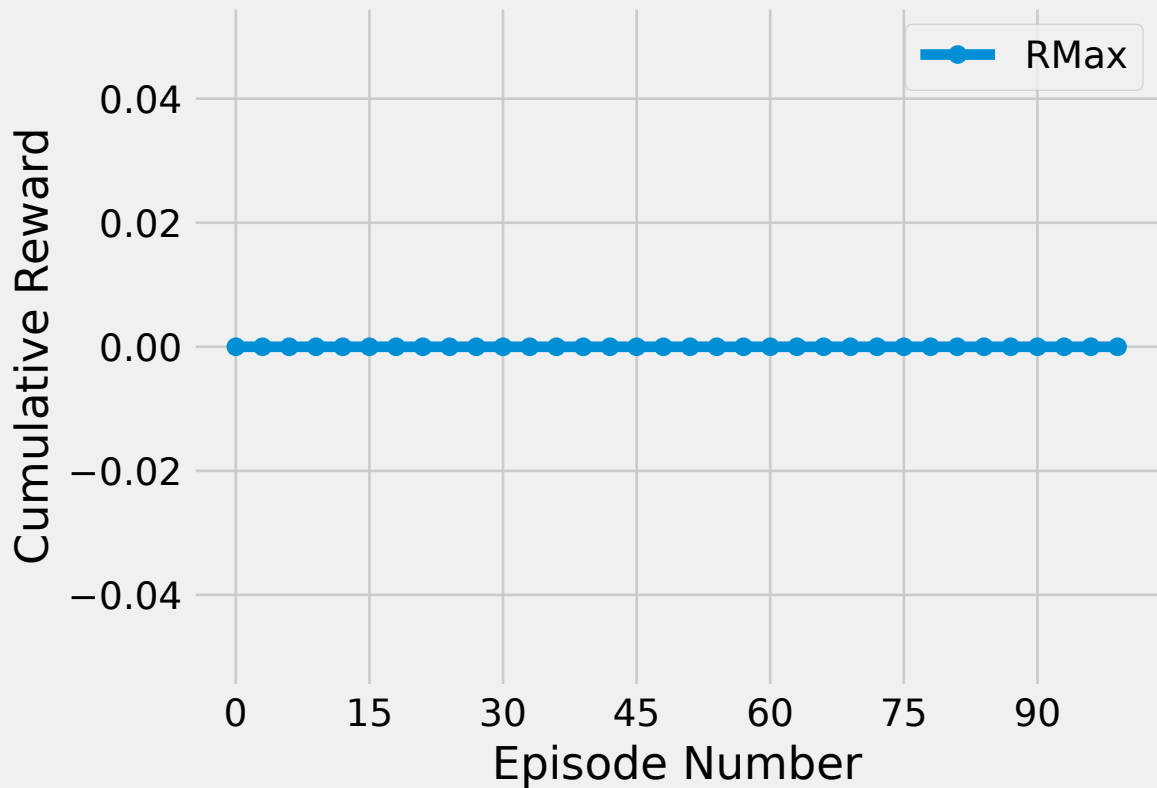

Supplement: supplementary_material [file attachment]

Cumulative Reward: Gym MiniGrid DoorKey 5x5 V

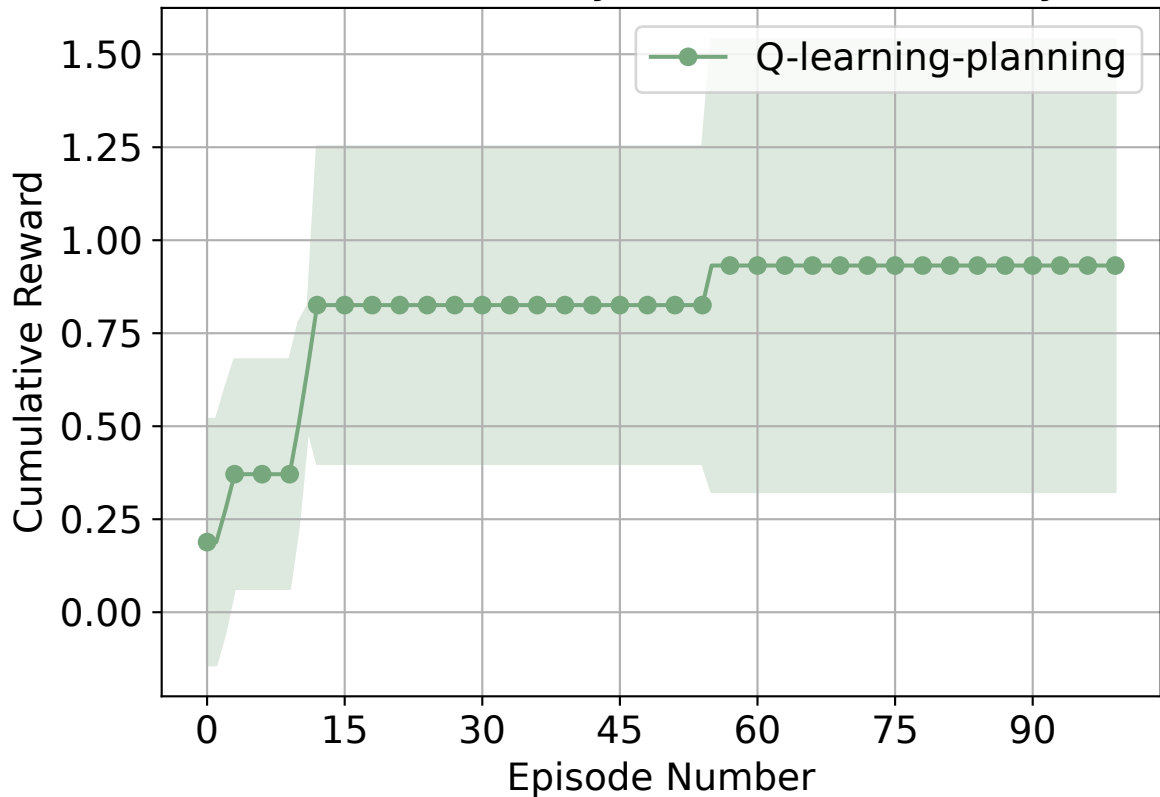

Supplement: supplementary_material [file attachment]

Cumulative Reward: Gym MiniGrid DoorKey 6x6 V

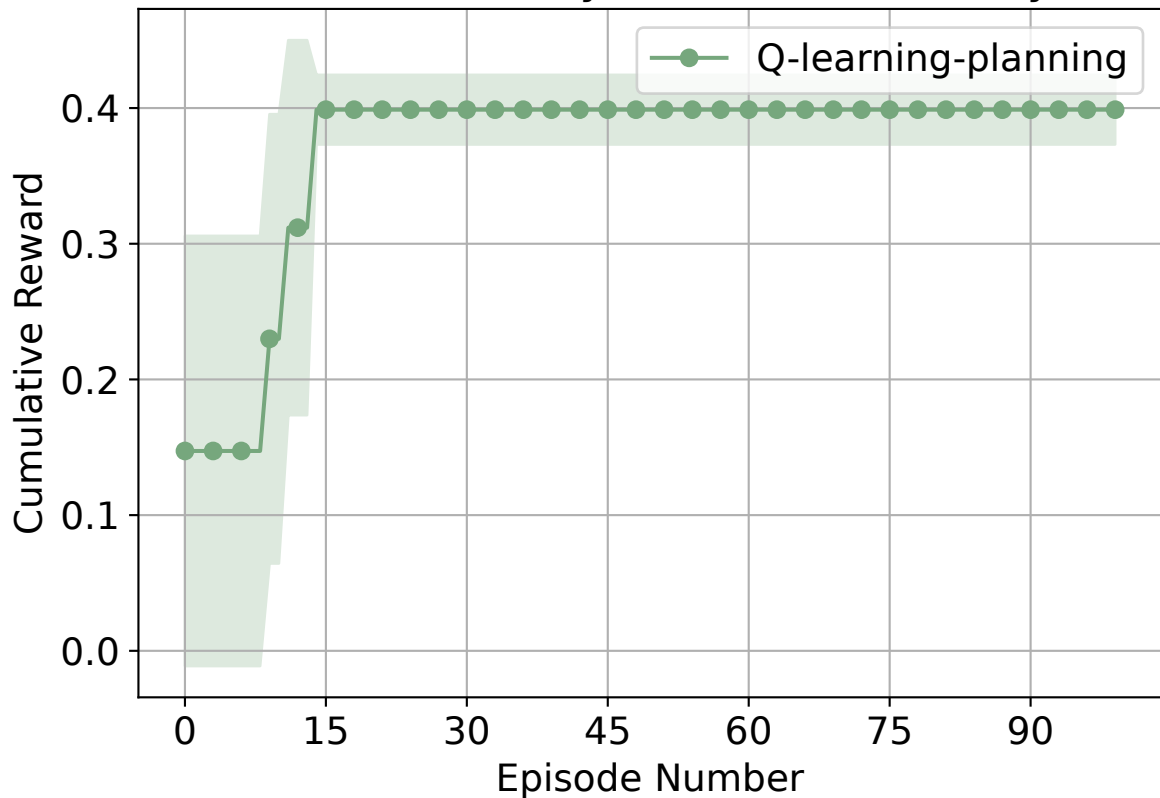

Supplement: supplementary_material [file attachment]

Cumulative Reward: Gym MiniGrid Empty 8x8

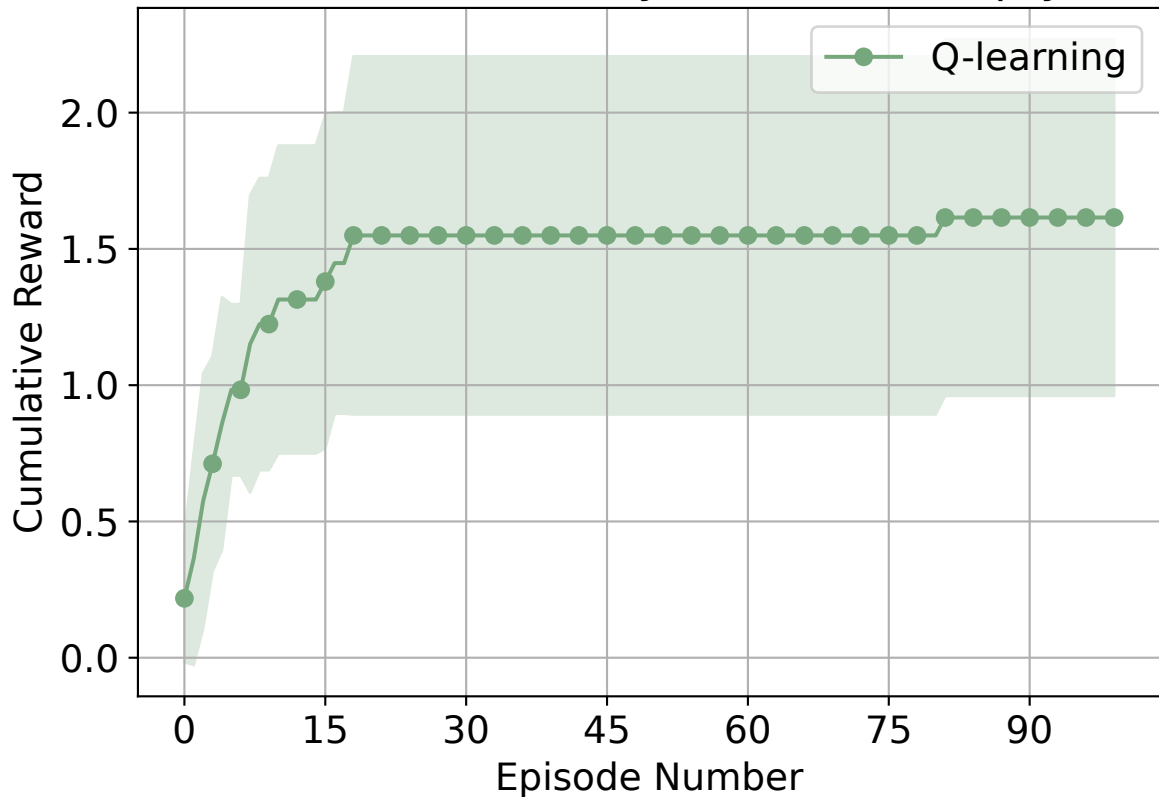

Supplement: supplementary_material [file attachment]

# Results

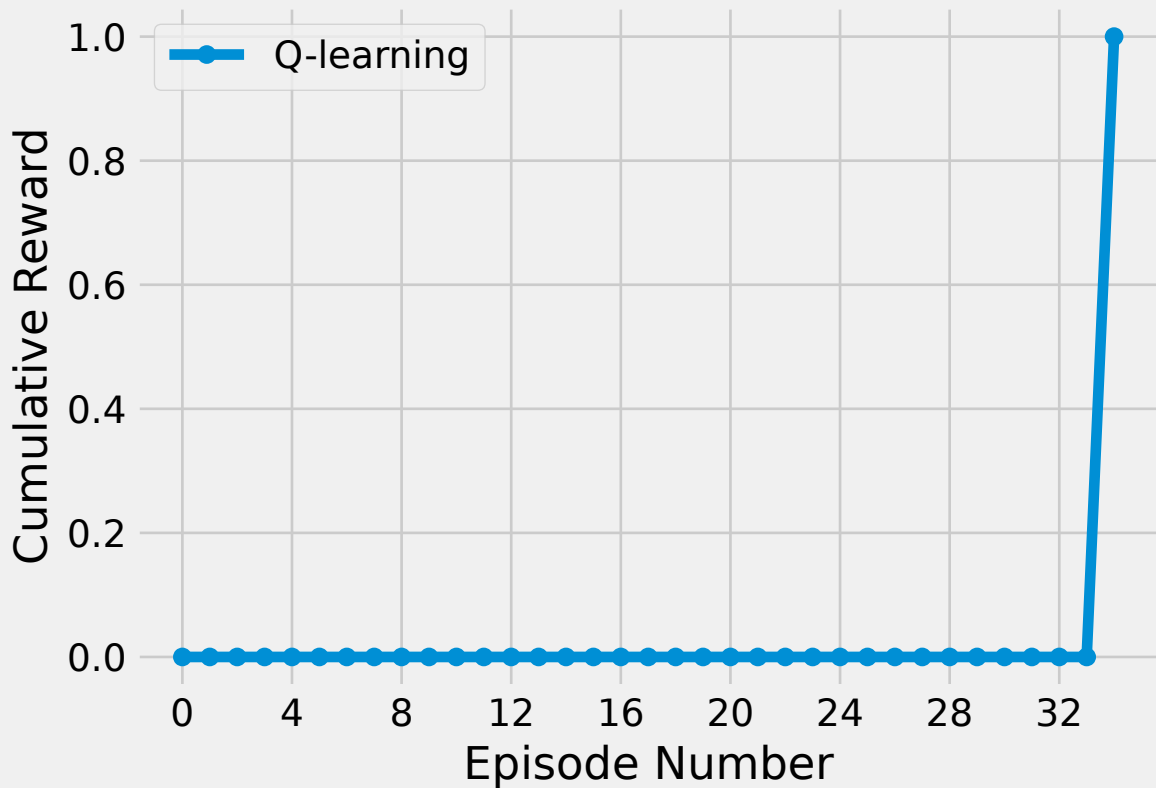

Supplement: supplementary_material [file attachment]

Cumulative Reward: Gym MiniGrid DoorKey 16x16

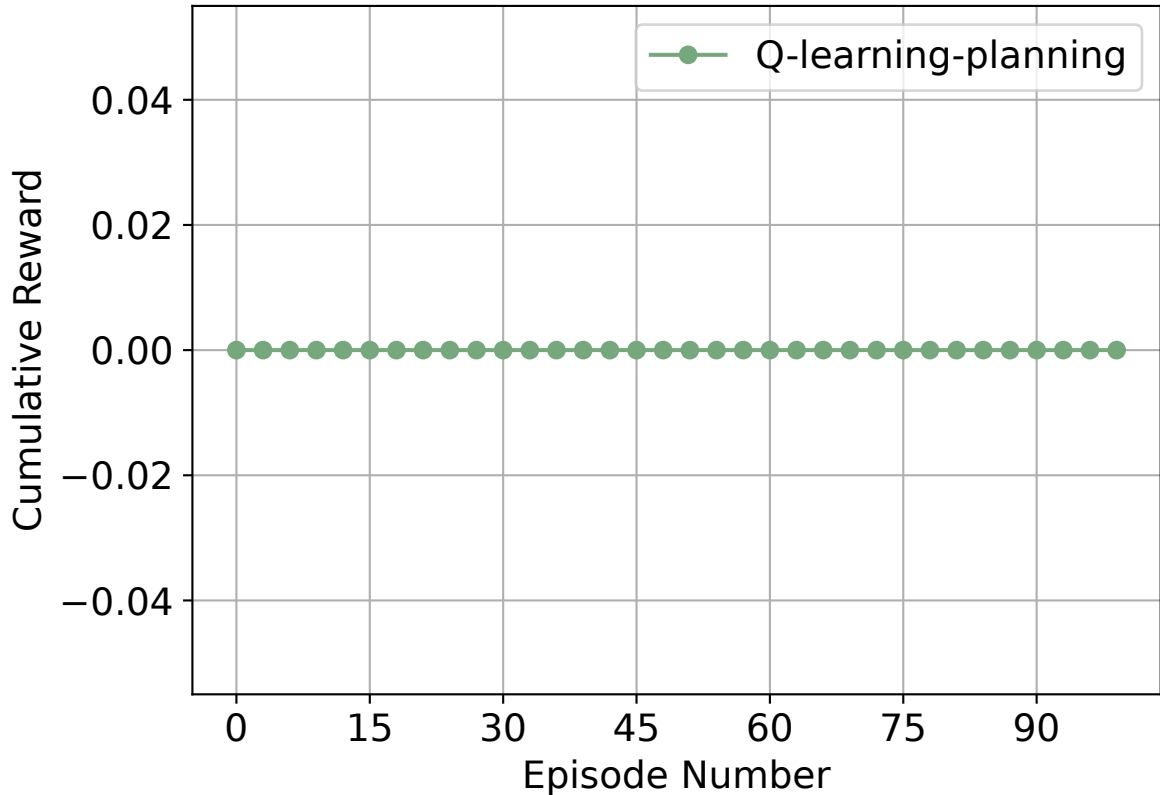

Supplement: supplementary_material [file attachment]
